# Supplementary material for: Bivariate Joint Spatial Modeling to Identify Shared Risk Patterns of Hypertension and Diabetes in South Africa: Evidence from WHO SAGE South Africa Wave 2
Source: Int J Environ Res Public Health. 2021 Jan 5;18(1):359. doi: 10.3390/ijerph18010359 (PMC7796507; doi:10.3390/ijerph18010359)
Supplement: Supplementary file 1 [file ijerph-18-00359-s001.pdf]

**Supplementary Table 1:** Population size and sample size, by province.

| Province      | Population estimate | % of total population | Number of 50+ sampled | % of 50+ sampled |
|---------------|---------------------|-----------------------|-----------------------|------------------|
|               | <i>N=54,956,900</i> |                       | <i>N=1,817</i>        |                  |
| Eastern Cape  | 6,916,200           | 12.6                  | 287                   | 15.8             |
| Free State    | 2,817,900           | 5.1                   | 157                   | 8.6              |
| Gauteng       | 13,200,300          | 24.0                  | 321                   | 17.7             |
| KwaZulu-Natal | 10,919,100          | 19.9                  | 311                   | 17.1             |
| Limpopo       | 5,726,800           | 10.4                  | 108                   | 5.9              |
| Mpumalanga    | 4,283,900           | 7.8                   | 220                   | 12.1             |
| Northern Cape | 1,185,600           | 2.2                   | 62                    | 3.4              |
| North West    | 3,707,000           | 6.7                   | 116                   | 6.4              |
| Western Cape  | 6,200,100           | 11.3                  | 235                   | 12.9             |

**Source:** Statistics SA 'Mid-year population estimates' (2015) Table 2 p 2.

**Supplementary Table 2:** Results of fitting stepwise backward elimination multiple logistic regression models for factors associated with hypertension and diabetes (p=0.10).

| VARIABLE                              | Description | HYPERTENSION      |         | DIABETES          |         |
|---------------------------------------|-------------|-------------------|---------|-------------------|---------|
|                                       |             | aOR (95% CI)      | P-value | aOR (95% CI)      | P-value |
| Demographic characteristics           |             |                   |         |                   |         |
| Age (years)                           |             | 1.05 (1.04; 1.06) | <0.001  | 1.04 (1.03; 1.05) | <0.001  |
| Sex                                   |             |                   |         |                   |         |
|                                       | Male        | Reference         |         | Reference         |         |
|                                       | Female      | 2.08 (1.46; 2.98) | <0.001  | 1.86 (1.3; 2.65)  | 0.001   |
| Socio-economic status characteristics |             |                   |         |                   |         |
| Household wealth tertile              |             |                   |         |                   |         |
|                                       | 1 [lowest]  | Reference         |         | Reference         |         |
|                                       | 2           | 0.82 (0.57; 1.16) | 0.257   | 0.59 (0.42; 0.85) | 0.004   |
|                                       | 3 [highest] | 0.63 (0.41; 0.97) | 0.037   | 0.42 (0.27; 0.64) | <0.001  |
| Support from government?              |             |                   |         |                   |         |
|                                       | No          | Reference         |         |                   |         |
|                                       | Yes         | 1.37 (1.00; 1.87) | 0.046   |                   |         |
|                                       |             |                   |         |                   |         |
| Years of schooling                    |             | 0.91 (0.87; 0.96) | <0.001  | 0.93 (0.88; 0.97) | 0.002   |
| Anthropological characteristics       |             |                   |         |                   |         |
| BMI                                   |             | 1.03 (1.01; 1.05) | 0.004   |                   |         |
| Behavioral characteristics            |             |                   |         |                   |         |
|                                       |             |                   |         |                   |         |
| Add salt at table?                    | No          |                   |         |                   |         |
|                                       | Yes         | 1.85 (1.37; 2.50) | <0.001  |                   |         |
| Ever used tobacco?                    | No          |                   |         | Reference         |         |
|                                       | Yes         |                   |         | 1.62 (1.12; 2.32) | 0.010   |

CI- Confidence Interval; aOR- adjusted odds ratio; Results are from multivariate logistic regression models adjusting for all the potential covariates listed in Table 2. Only significant variables are reported
